# Supplementary material for: Vitamin D biofortification of salmon ( Salmo salar ) processing offcuts to create novel shelf-stable foods
Source: Royal Society of Chemistry journal article supplement (doi:10.1039/d5fb00404g), 2025-12-15
Supplement: d5fb00404g1.pdf [file d5fb00404g1.pdf]

SUPPLEMENTARY DATA

Vitamin D biofortification of salmon (*Salmo salar*) processing offcuts to create novel shelf-stable foods

Eleanor Dunlop,<sup>a,b</sup> Alexis Wing Huen Chung,<sup>c</sup> Janet Howieson,<sup>c</sup> Belinda Neo,<sup>d</sup> Welma Stonehouse,<sup>a</sup> Paul Adorno,<sup>e</sup> Georgios Dabos,<sup>e</sup> Linda Portsmouth,<sup>b</sup> Lucinda J Black<sup>a,b</sup>

<sup>a</sup> Institute for Physical Activity and Nutrition (IPAN), School of Exercise and Nutrition Sciences, Deakin University, Geelong VIC 3220, Australia.  
<sup>b</sup> Curtin School of Population Health, Curtin University, Kent Street, Bentley WA 6102, Australia.  
<sup>c</sup> Curtin School of Molecular and Life Sciences, Faculty of Science and Engineering, Curtin University, Kent Street, Bentley WA 6102, Australia.  
<sup>d</sup> Curtin Medical School, Curtin University, Kent Street, Bentley WA 6102, Australia.  
<sup>e</sup> National Measurement Institute, 1/153 Bertie Street, Port Melbourne, VIC 3207, Australia.

**Supplementary Table 1** Fatty acid profiles of crispy salmon skin snacks and salmon jerky treated with pulsed ultraviolet light

| Fatty acid (% of total)            | Crispy salmon skin snacks |          |          | Salmon jerky |          |          |
|------------------------------------|---------------------------|----------|----------|--------------|----------|----------|
|                                    | Sample A                  | Sample B | Sample C | Sample A     | Sample B | Sample C |
| C4:0 Butyric                       | <0.1                      | <0.1     | <0.1     | <0.1         | <0.1     | <0.1     |
| C6:0 Caproic                       | <0.1                      | <0.1     | <0.1     | <0.1         | <0.1     | <0.1     |
| C8:0 Caprylic                      | <0.1                      | <0.1     | <0.1     | <0.1         | <0.1     | <0.1     |
| C10:0 Capric                       | <0.1                      | <0.1     | <0.1     | <0.1         | <0.1     | <0.1     |
| C12:0 Lauric                       | 0.1                       | <0.1     | 0.1      | <0.1         | <0.1     | <0.1     |
| C14:0 Myristic                     | 1.0                       | 1.0      | 1.0      | 1.3          | 1.3      | 1.4      |
| C15:0 Pentadecanoic                | 0.1                       | 0.1      | 0.1      | 0.2          | 0.2      | 0.2      |
| C16:0 Palmitic                     | 11.2                      | 11.2     | 10.9     | 9.4          | 9.5      | 9.4      |
| C17:0 Margaric                     | 0.2                       | 0.2      | 0.2      | 0.2          | 0.2      | 0.2      |
| C18:0 Stearic                      | 3.4                       | 3.4      | 3.4      | 3.2          | 3.2      | 3.2      |
| C20:0 Arachidic                    | 0.4                       | 0.4      | 0.4      | 0.4          | 0.4      | 0.4      |
| C22:0 Behenic                      | 0.2                       | 0.2      | 0.2      | 0.2          | 0.2      | 0.2      |
| C24:0 Lignoceric                   | <0.1                      | <0.1     | <0.1     | 0.1          | <0.1     | <0.1     |
| Total (sum) saturated              | 16.5                      | 16.5     | 16.3     | 14.9         | 15.0     | 15.1     |
| C14:1 Myristoleic                  | <0.1                      | <0.1     | <0.1     | <0.1         | <0.1     | <0.1     |
| C16:1 Palmitoleic                  | 1.6                       | 1.6      | 1.6      | 1.9          | 1.9      | 1.9      |
| C17:1 Heptadecenoic                | <0.1                      | <0.1     | <0.1     | <0.1         | <0.1     | <0.1     |
| C18:1 Oleic                        | 51.0                      | 51.0     | 50.0     | 43.4         | 43.4     | 43.5     |
| C18:1 Vaccenic                     | 3.0                       | 3.1      | 3.1      | 3.3          | 3.3      | 3.3      |
| C20:1 Eicosenic                    | 1.4                       | 1.4      | 1.3      | 2.0          | 1.9      | 2.0      |
| C22:1 Cetoleic                     | 0.1                       | 0.1      | 0.1      | 0.2          | 0.2      | 0.2      |
| C22:1 Docosenoic (Erucic)          | 0.1                       | 0.1      | 0.1      | 0.2          | 0.2      | 0.2      |
| C24:1 Nervonic                     | 0.1                       | 0.2      | 0.2      | 0.2          | 0.2      | 0.2      |
| Total (sum) monounsaturated        | 57.2                      | 57.3     | 56.3     | 51.0         | 51.1     | 51.3     |
| C16:4 Hexadecatetraenoic           | <0.1                      | <0.1     | <0.1     | <0.1         | <0.1     | <0.1     |
| C18:4 Moroctic                     | 0.4                       | 0.35     | 0.4      | 0.5          | 0.5      | 0.5      |
| C18:2w6 Linoleic                   | 13.0                      | 13.1     | 13.5     | 16.5         | 16.5     | 16.5     |
| C18:3w6 gamma-Linolenic            | 0.2                       | 0.2      | 0.2      | 0.2          | 0.2      | 0.2      |
| C18:3w3 alpha-Linolenic            | 4.0                       | 4.1      | 4.3      | 5.9          | 6.0      | 6.0      |
| C20:2w6 Eicosadienoic              | 0.7                       | 0.7      | 0.7      | 1.0          | 1.0      | 1.0      |
| C20:3w6 Eicosatrienoic             | 0.3                       | 0.3      | 0.3      | 0.3          | 0.4      | 0.3      |
| C20:3w3 Eicosatrienoic             | 0.3                       | 0.3      | 0.3      | 0.4          | 0.4      | 0.4      |
| C20:4w6 Arachidonic                | 0.7                       | 0.6      | 0.6      | 0.4          | 0.4      | 0.4      |
| C20:5w3 Eicosapentaenoic           | 1.6                       | 1.5      | 1.7      | 1.6          | 1.6      | 1.6      |
| C22:2w6 Docosadienoic              | <0.1                      | <0.1     | <0.1     | <0.1         | <0.1     | <0.1     |
| Omega-3 fatty acids                | 11.2                      | 11.1     | 11.9     | 15.2         | 15.0     | 14.8     |
| Omega-6 fatty acids                | 14.8                      | 14.8     | 15.2     | 18.5         | 18.5     | 18.5     |
| C22:4w6 Docosatetraenoic           | <0.1                      | <0.1     | <0.1     | <0.1         | <0.1     | <0.1     |
| C22:5w3 Docosapentaenoic           | 0.6                       | 0.6      | 0.6      | 1.1          | 0.9      | 0.8      |
| C22:6w3 Docosahexaenoic            | 4.4                       | 4.4      | 4.7      | 5.6          | 5.7      | 5.5      |
| Total (sum) polyunsaturated        | 26.0                      | 25.9     | 27.0     | 33.7         | 33.5     | 33.2     |
| Total (sum) mono trans fatty acids | 0.3                       | 0.3      | 0.3      | 0.2          | 0.2      | 0.2      |
| Total (sum) poly trans fatty acids | <0.1                      | <0.1     | 0.1      | 0.3          | 0.3      | 0.4      |
| P:M:S ratio                        | <0.1                      | <0.1     | <0.1     | <0.1         | <0.1     | <0.1     |

P:M:S, polyunsaturated:monounsaturated:saturated
